# Supplementary material
Source: Springer Nature journal article supplement (https://www.springermedizin.de/resource/supplementary/12957_2011_837_MOESM1_ESM.pdf/9565982)

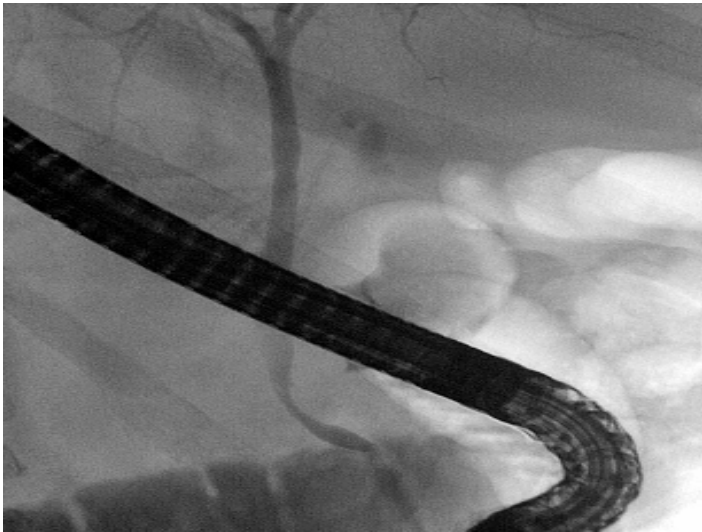

Supplement: MOESM1 [file 9565982]
